# Supplementary material for: Porous direct Z-scheme heterostructures of S-deficient CoS/CdS hexagonal nanoplates for robust photocatalytic H2 generation
Source: Royal Society of Chemistry journal article supplement (doi:10.1039/d1ce01453f), 2021-12-01
Supplement: d1ce01453f1.pdf [file d1ce01453f1.pdf]

## Supporting Information

### **Porous direct Z-scheme heterostructures of S-deficient CoS/CdS hexagonal nanoplates for robust photocatalytic H<sub>2</sub> generation**

Zhihui Li,<sup>a</sup> Hanchu Chen,<sup>a,c</sup> Yanyan Li,<sup>a</sup> Hui Wang,<sup>a,c</sup> Yanru Liu,<sup>a</sup> Xia Li,<sup>d</sup> Haifeng Lin,<sup>a,\*</sup> Shaoxiang Li<sup>b</sup> and Lei Wang<sup>a,b</sup>

<sup>a</sup> *Key Laboratory of Eco-chemical Engineering, Key Laboratory of Optic-electric Sensing and Analytical Chemistry of Life Science, Shandong Provincial Key Laboratory of Olefin Catalysis and Polymerization, Taishan Scholar Advantage and Characteristic Discipline Team of Eco-Chemical Process and Technology, College of Chemistry and Molecular Engineering, Qingdao University of Science and Technology, Qingdao 266042, P. R. China*

<sup>b</sup> *Shandong Engineering Research Center for Marine Environment Corrosion and Safety Protection, College of Environment and Safety Engineering, Qingdao University of Science and Technology, Qingdao 266042, P. R. China*

<sup>c</sup> *Shandong Provincial Key Laboratory of Olefin Catalysis and Polymerization, Key Laboratory of Rubber-Plastics of Ministry of Education, School of Polymer Science and Engineering, Qingdao University of Science and Technology, Qingdao 266042, P. R. China*

<sup>d</sup> *Innovation Center for Chemical Science, College of Chemistry, Chemical Engineering and Materials Science, Soochow University, Suzhou 215006, P. R. China*

\* Corresponding author. E-mail address: hflin20088@126.com (H. Lin).

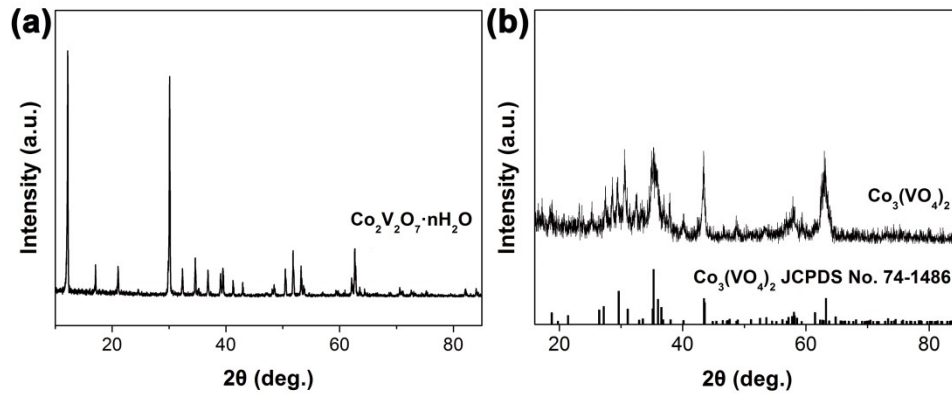

Fig. S1. XRD patterns of (a)  $\text{Co}_2\text{V}_2\text{O}_7 \cdot n\text{H}_2\text{O}$  and (b)  $\text{Co}_3(\text{VO}_4)_2$  HNPs.

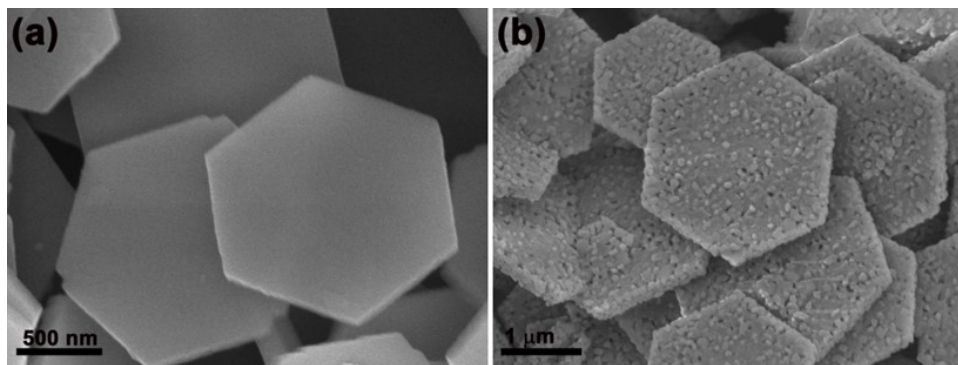

Fig. S2. SEM images of (a)  $\text{Co}_2\text{V}_2\text{O}_7 \cdot n\text{H}_2\text{O}$  and (b)  $\text{Co}_3(\text{VO}_4)_2$  HNPs.

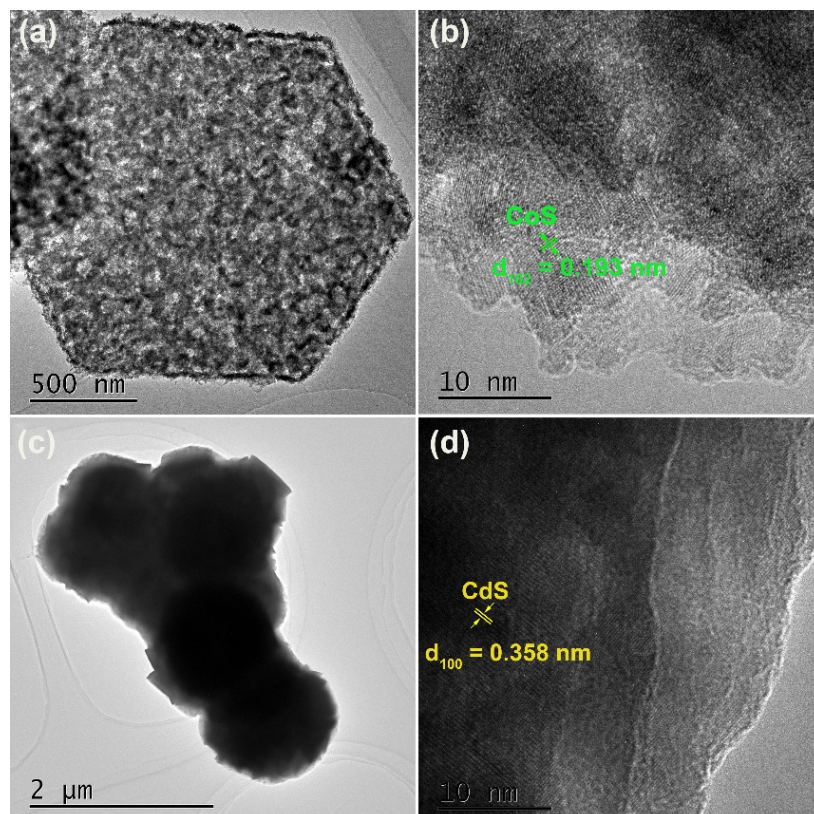

Fig. S3. (a, c) TEM and (b, d) HRTEM images of (a, b)  $\text{CoS}$  HNPs and (c, d)  $\text{CdS}$  nanocrystals.

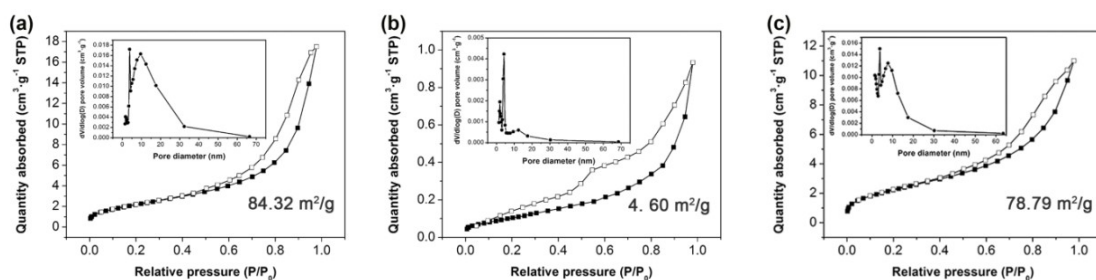

**Fig. S4.** N<sub>2</sub> adsorption-desorption isotherms and corresponding pore-size distributions of (a) CoS HNPs, (b) CdS nanocrystals, and (c) CoS/40% CdS hybrid HNPs.

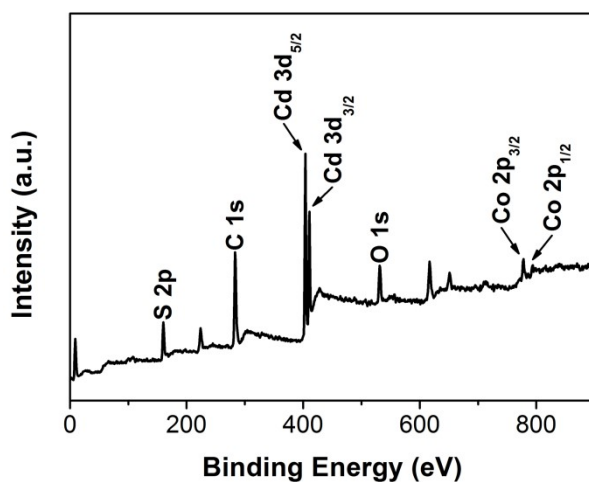

**Fig. S5.** XPS survey spectrum of the CoS/40% CdS hybrid HNPs.

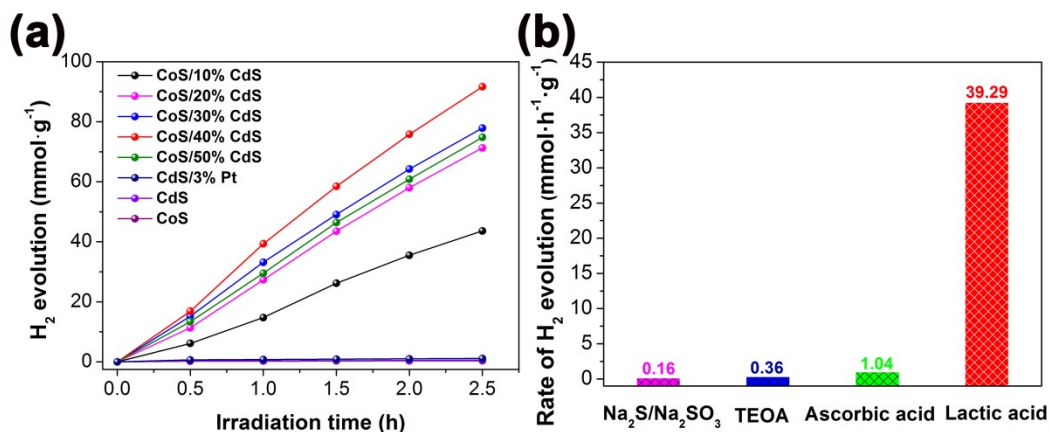

**Fig. S6.** (a) Photocatalytic H<sub>2</sub> evolution activities of different samples. (b) Average HER rates of CoS/40% CdS measured with different sacrificial agents.

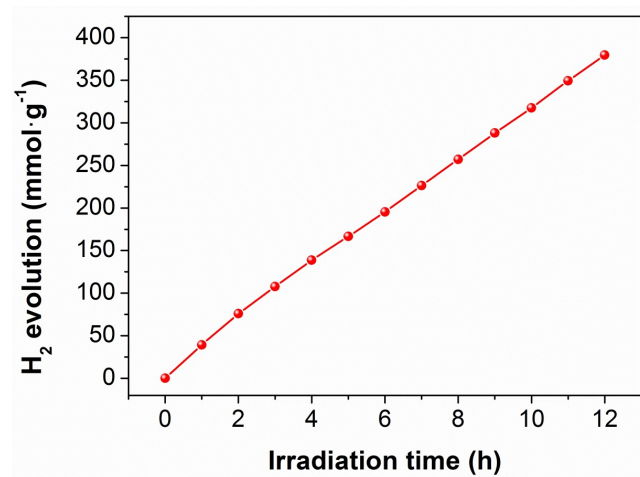

Fig. S7. Photocatalytic HER activity of CoS/40% CdS measured for 12 hours.

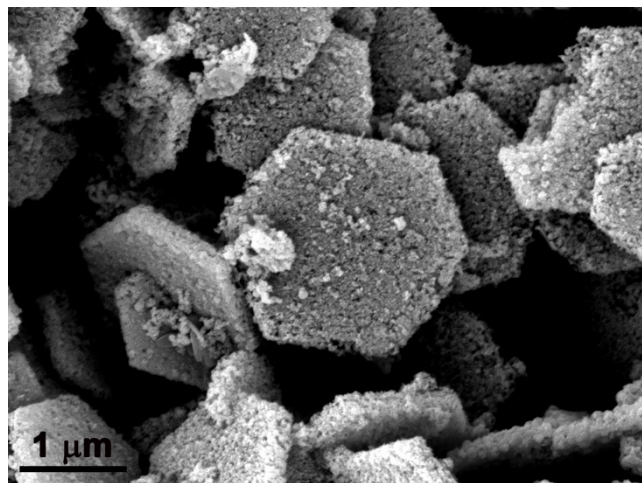

Fig. S8. SEM graph of the CoS/40% CdS composite after photocatalytic reaction.

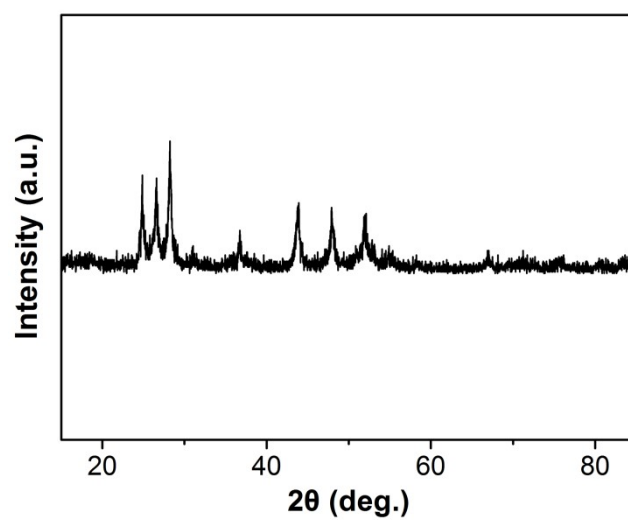

Fig. S9. XRD pattern of the CoS/40% CdS hybrid after photocatalytic test.

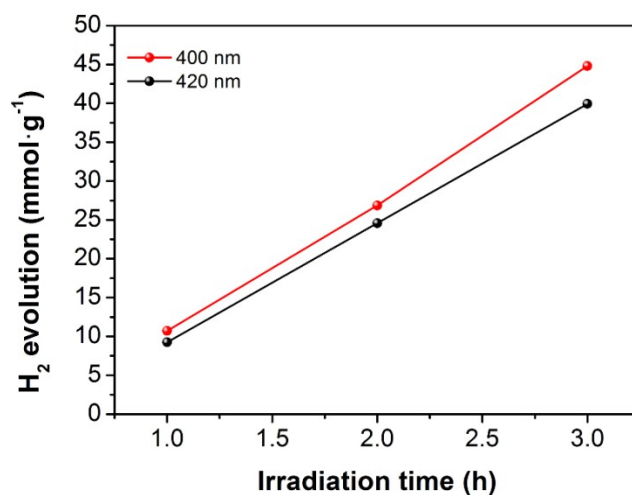

**Fig. S10.** HER activities of CoS/40% CdS tested under 400-nm and 420-nm monochromatic-light irradiation.

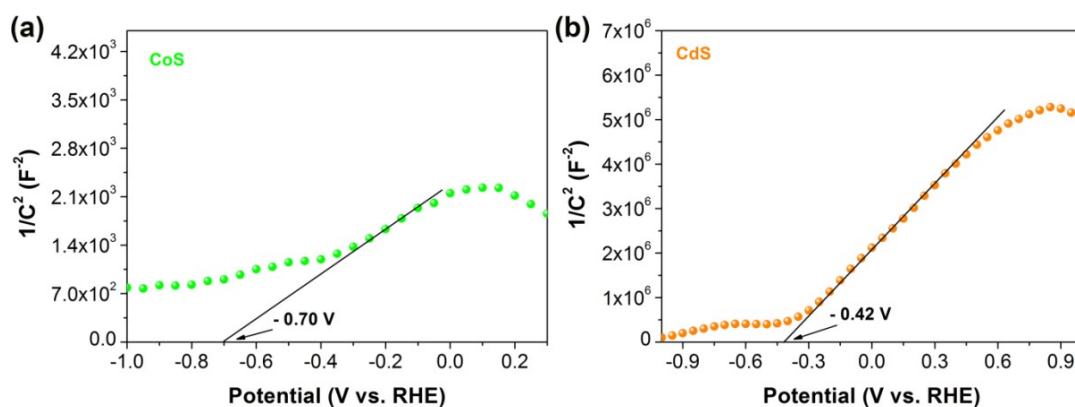

**Fig. S11.** Mott-Schottky curves of (a) CoS HNPs and (b) CdS nanocrystals.

**Table S1.** Visible-light-induced HER activities of CdS- and CoS-based composite photocatalysts.

| Photocatalyst                                           | Hole scavenger (aqueous solution)                 | Light source (Xe lamp) | Maximum rate (mmol·h <sup>-1</sup> ·g <sup>-1</sup> ) | AQY (420 nm)            | Reference |
|---------------------------------------------------------|---------------------------------------------------|------------------------|-------------------------------------------------------|-------------------------|-----------|
| CoS/CdS                                                 | Lactic acid                                       | $\lambda > 400$ nm     | 39.29                                                 | 12.5%<br>14.5% (400 nm) | This work |
| CdS/Co <sub>3</sub> S <sub>4</sub>                      | Lactic acid                                       | $\lambda > 420$ nm     | 1.08                                                  | -                       | [1]       |
| CdS/CoS <sub>x</sub>                                    | Lactic acid                                       | $\lambda > 420$ nm     | 9.47                                                  | -                       | [2]       |
| CdS/Co <sub>9</sub> S <sub>8</sub>                      | Lactic acid                                       | $\lambda > 420$ nm     | 11.60                                                 | -                       | [3]       |
| CoS <sub>x</sub> /Mn <sub>0.5</sub> Cd <sub>0.5</sub> S | Na <sub>2</sub> S/Na <sub>2</sub> SO <sub>3</sub> | $\lambda > 420$ nm     | 8.60                                                  | 4.7%                    | [4]       |
| CdS/Co <sub>9</sub> S <sub>8</sub>                      | Na <sub>2</sub> S/Na <sub>2</sub> SO <sub>3</sub> | $\lambda > 420$ nm     | 1.06                                                  | -                       | [5]       |
| CdS/Co <sub>9</sub> S <sub>8</sub> -RGO                 | Na <sub>2</sub> S/Na <sub>2</sub> SO <sub>3</sub> | $\lambda > 420$ nm     | 4.82                                                  | -                       | [6]       |
| Co <sub>3</sub> S <sub>4</sub> /Co-CdS                  | Na <sub>2</sub> S/Na <sub>2</sub> SO <sub>3</sub> | $\lambda > 420$ nm     | 15.17                                                 | -                       | [7]       |

|                                                                      |                                                   |                       |       |       |      |
|----------------------------------------------------------------------|---------------------------------------------------|-----------------------|-------|-------|------|
| <b>CdS/CoS<sub>2</sub></b>                                           | Ascorbic acid                                     | $\lambda > 420$ nm    | 5.54  | 10.2% | [8]  |
| <b>Co<sub>9</sub>S<sub>8</sub>/CdS</b>                               | Na <sub>2</sub> S/Na <sub>2</sub> SO <sub>3</sub> | $\lambda > 420$ nm    | 14.96 | -     | [9]  |
| <b>Co<sub>x</sub>S/SCN</b>                                           | Triethanolamine                                   | $\lambda > 420$ nm    | 0.57  | -     | [10] |
| <b>CdS/CoO<sub>x</sub></b>                                           | Na <sub>2</sub> S/Na <sub>2</sub> SO <sub>3</sub> | $\lambda > 420$ nm    | 3.50  | -     | [11] |
| <b>CdS/Co-MoS<sub>x</sub></b>                                        | Lactic acid                                       | $\lambda > 420$ nm    | 13.50 | 23.5% | [12] |
| <b>CdS/CoMoS<sub>4</sub></b>                                         | Lactic acid                                       | $\lambda > 420$ nm    | 2.68  | -     | [13] |
| <b>a-CoMoS<sub>x</sub>/CdS</b>                                       | Lactic acid                                       | $\lambda > 420$ nm    | 3.57  | -     | [14] |
| <b>Cd<sub>0.5</sub>Zn<sub>0.5</sub>S/CoO</b>                         | Na <sub>2</sub> S/Na <sub>2</sub> SO <sub>3</sub> | $\lambda > 420$ nm    | 1.78  | -     | [15] |
| <b>Co<sub>3</sub>S<sub>4</sub>/CNNS</b>                              | Triethanolamine                                   | $\lambda > 420$ nm    | 20.54 | 7.9%  | [16] |
| <b>CdS/CoO</b>                                                       | Lactic acid                                       | $\lambda > 420$ nm    | 6.45  | -     | [17] |
| <b>WO<sub>3</sub>/CoS<sub>2</sub></b>                                | Triethanolamine                                   | $\lambda \geq 420$ nm | 4.42  | -     | [18] |
| <b>Co<sub>9</sub>S<sub>8</sub>/Zn<sub>0.5</sub>Cd<sub>0.5</sub>S</b> | Na <sub>2</sub> S/Na <sub>2</sub> SO <sub>3</sub> | $\lambda > 400$ nm    | 10.90 | -     | [19] |
| <b>CoS<sub>2</sub>/g-C<sub>3</sub>N<sub>4</sub></b>                  | Triethanolamine                                   | $\lambda > 420$ nm    | 0.58  | 1.1%  | [20] |

## References:

- [1] F. Zhang, H.Q. Zhuang, J. Song, Y.L. Men, Y.X. Pan, S.H. Yu, Coupling cobalt sulfide nanosheets with cadmium sulfide nanoparticles for highly efficient visible-light-driven photocatalysis, *Appl. Catal. B: Environ.*, 2018, **226**, 103–110.
- [2] W. B. Li, K. Fang, Y. G. Zhang, Z. W. Chen, L. Wang and Y. Y. Bu, Fabrication of 1D/2D CdS/CoS<sub>x</sub> direct Z-scheme photocatalyst with enhanced photocatalytic hydrogen evolution performance, *Int. J. Hydrogen Energy*, 2021, **46**, 9351-9359.
- [3] C. Feng, Z. Y. Chen, J. P. Jing, M. M. Sun, J. Han, K. Fang and W. B. Li, Synergistic effect of hierarchical structure and Z-scheme heterojunction constructed by CdS nanoparticles and nanoflower-structured Co<sub>9</sub>S<sub>8</sub> with significantly enhanced photocatalytic hydrogen production performance, *J. Photochem. Photobiol. A: Chem.*, 2021, **409**, 113160.
- [4] M. D. Wang, Q. W. Liu, N. Xu, N. X. Su, X. X. Wang and W. Y. Su, An amorphous CoS<sub>x</sub> modified Mn<sub>0.5</sub>Cd<sub>0.5</sub>S solid solution with enhanced visible-light photocatalytic H<sub>2</sub>-production activity, *Catal. Sci. Technol.*, 2018, **8**, 4122-4128.
- [5] B. Qiu, Q. Zhu, M. Du, L. Fan, M. Xing and J. Zhang, Efficient Solar Light Harvesting CdS/Co<sub>9</sub>S<sub>8</sub> Hollow Cubes for Z-Scheme Photocatalytic Water Splitting, *Angew. Chem. Int. Ed.*, 2017, **56**, 2684-2688.
- [6] S. S. Kai, B. J. Xi, H. B. Li and S. L. Xiong, Z-scheme CdS/Co<sub>9</sub>S<sub>8</sub>-RGO for photocatalytic hydrogen production, *Inorg. Chem. Front.*, 2020, **7**, 2692-2701.
- [7] Y. P. Liu, B. X. Wang, Q. Zhang, S. Y. Yang, Y. H. Li, J. L. Zuo, H. J. Wang and F. Peng, A novel bicomponent Co<sub>3</sub>S<sub>4</sub>/Co@C cocatalyst on CdS, accelerating charge separation for highly efficient photocatalytic hydrogen evolution, *Green Chem.*, 2020, **22**, 238-247.
- [8] P. F. Wang, Y. S. Mao, L. N. Li, Z. R. Shen, X. Luo, K. F. Wu, P. F. An, H. T. Wang, L. N. Su, Y. Li and S. H. Zhan, Unraveling the Interfacial Charge Migration Pathway at the Atomic Level in a Highly Efficient Z-Scheme Photocatalyst, *Angew. Chem. Int. Ed.*, 2019, **58**, 11329-11334.
- [9] C. Xia, C. Y. Xue, W. X. Bian, J. Liu, J. J. Wang, Y. J. Wei and J. B. Zhang, Hollow Co<sub>9</sub>S<sub>8</sub>/CdS Nanocages as Efficient Photocatalysts for Hydrogen Evolution, *ACS Appl. Nano Mater.*, 2021, **4**,



2743-2751.

- [10] Q. H. Shen, R. H. Bibi, L. F. Wei, D. D. Hao, N. X. Li and J. C. Zhou, Well-dispersed  $\text{CoS}_x$  nanoparticles modified tubular sulfur doped carbon nitride for enhanced photocatalytic  $\text{H}_2$  production activity, *Int. J. Hydrogen Energy*, 2019, **44**, 14550-14560.
- [11] Y. Liu, S. P. Ding, Y. Q. Shi, X. F. Liu, Z. Z. Wu, Q. Q. Jiang, T. F. Zhou, N. K. Liu and J. C. Hu, Construction of  $\text{CdS}/\text{CoO}_x$  core-shell nanorods for efficient photocatalytic  $\text{H}_2$  evolution, *Appl. Catal. B: Environ.*, 2018, **234**, 109–116.
- [12] Y. G. Lei, J. H. Hou, F. Wang, X. H. Ma, Z. L. Jin, J. Xu and S. X. Min, Boosting the catalytic performance of  $\text{MoS}_x$  cocatalysts over  $\text{CdS}$  nanoparticles for photocatalytic  $\text{H}_2$  evolution by Co doping via a facile photochemical route, *Appl. Surf. Sci.*, 2017, **420**, 456–464.
- [13] Q. H. Li, X. Q. Qiao, Y. L. Jia, D. F. Hou and D. S. Li, Amorphous  $\text{CoMoS}_4$  Nanostructure for Photocatalytic  $\text{H}_2$  Generation, Nitrophenol Reduction, and Methylene Blue Adsorption, *ACS Appl. Nano Mater.*, 2020, **3**, 68-76.
- [14] W. J. Liu, X. F. Wang, H. G. Yu and J. G. Yu, Direct Photoinduced Synthesis of Amorphous  $\text{CoMoS}_x$  Cocatalyst and Its Improved Photocatalytic  $\text{H}_2$ -Evolution Activity of  $\text{CdS}$ , *ACS Sustainable Chem. Eng.*, 2018, **6**, 12436–12445.
- [15] H. T. Zhao, L. Y. Guo, C. W. Xing, H. Y. Liu and X. Y. Li, A homojunction–heterojunction–homojunction scaffold boosts photocatalytic  $\text{H}_2$  evolution over  $\text{Cd}_{0.5}\text{Zn}_{0.5}\text{S}/\text{CoO}$  hybrids, *J. Mater. Chem. A*, 2020, **8**, 1955–1965.
- [16] H. C. Yang, J. M. Yin, R. Y. Cao, P. X. Sun, S. W. Zhang and X. J. Xu, Constructing highly dispersed 0D  $\text{Co}_3\text{S}_4$  quantum dots/2D  $\text{g-C}_3\text{N}_4$  nanosheets nanocomposites for excellent photocatalytic performance, *Sci. Bull.*, 2019, **64**, 1510-1517.
- [17] J. Y. Chu, G. J. Sun, X. J. Han, X. Chen, J. J. Wang, W. Hu, I. Waluyo, A. Hunt, Y. C. Du, B. Song and P. Xu, Ultrafine  $\text{CoO}$  nanoparticles as an efficient cocatalyst for enhanced photocatalytic hydrogen evolution, *Nanoscale*, 2019, **11**, 15633-15640.
- [18] L. J. Ma, J. Xu, L. J. Li, M. Mao and S. Zhao, Hydrothermal synthesis of  $\text{WO}_3/\text{CoS}_2$  n–n heterojunction for Z-scheme photocatalytic  $\text{H}_2$  evolution, *New J. Chem.*, 2020, **44**, 18326-18336.
- [19] X. L. Li, R. B. He, Y. J. Dai, S. S. Li, N. Xiao, A. X. Wang, Y. Q. Gao, N. Li, J. F. Gao, L. H. Zhang and L. Ge, Design and fabrication of  $\text{Co}_9\text{S}_8/\text{Zn}_{0.5}\text{Cd}_{0.5}\text{S}$  hollow nanocages with significantly enhanced photocatalytic hydrogen production activity, *Chem. Eng. J.*, 2020, **400**, 125474.
- [20] Y. Z. Zhang, J. W. Shi, Z. X. Huang, X. J. Guan, S. C. Zong, C. Cheng, B. T. Zheng and L. J. Guo, Synchronous construction of  $\text{CoS}_2$  in-situ loading and S doping for  $\text{g-C}_3\text{N}_4$ : Enhanced photocatalytic  $\text{H}_2$ -evolution activity and mechanism insight, *Chem. Eng. J.*, 2020, **401**, 126135.
